# Supplementary material for: Distribution of Heavy Metals in the Commune of Coronel, Chile
Source: MDPI journal article supplement (doi:10.3390/min12030320), 2022-03-04
Supplement: s1 [file s1]

Archive with 1 entries (1 files):
- minerals-1547106-supplementary.pdf
