# Supplementary material for: Distribution of Heavy Metals in the Commune of Coronel, Chile
Source: MDPI journal article supplement (doi:10.3390/min12030320), 2022-03-04
Supplement: s1 [file s1 › minerals-1547106-supplementary.pdf]

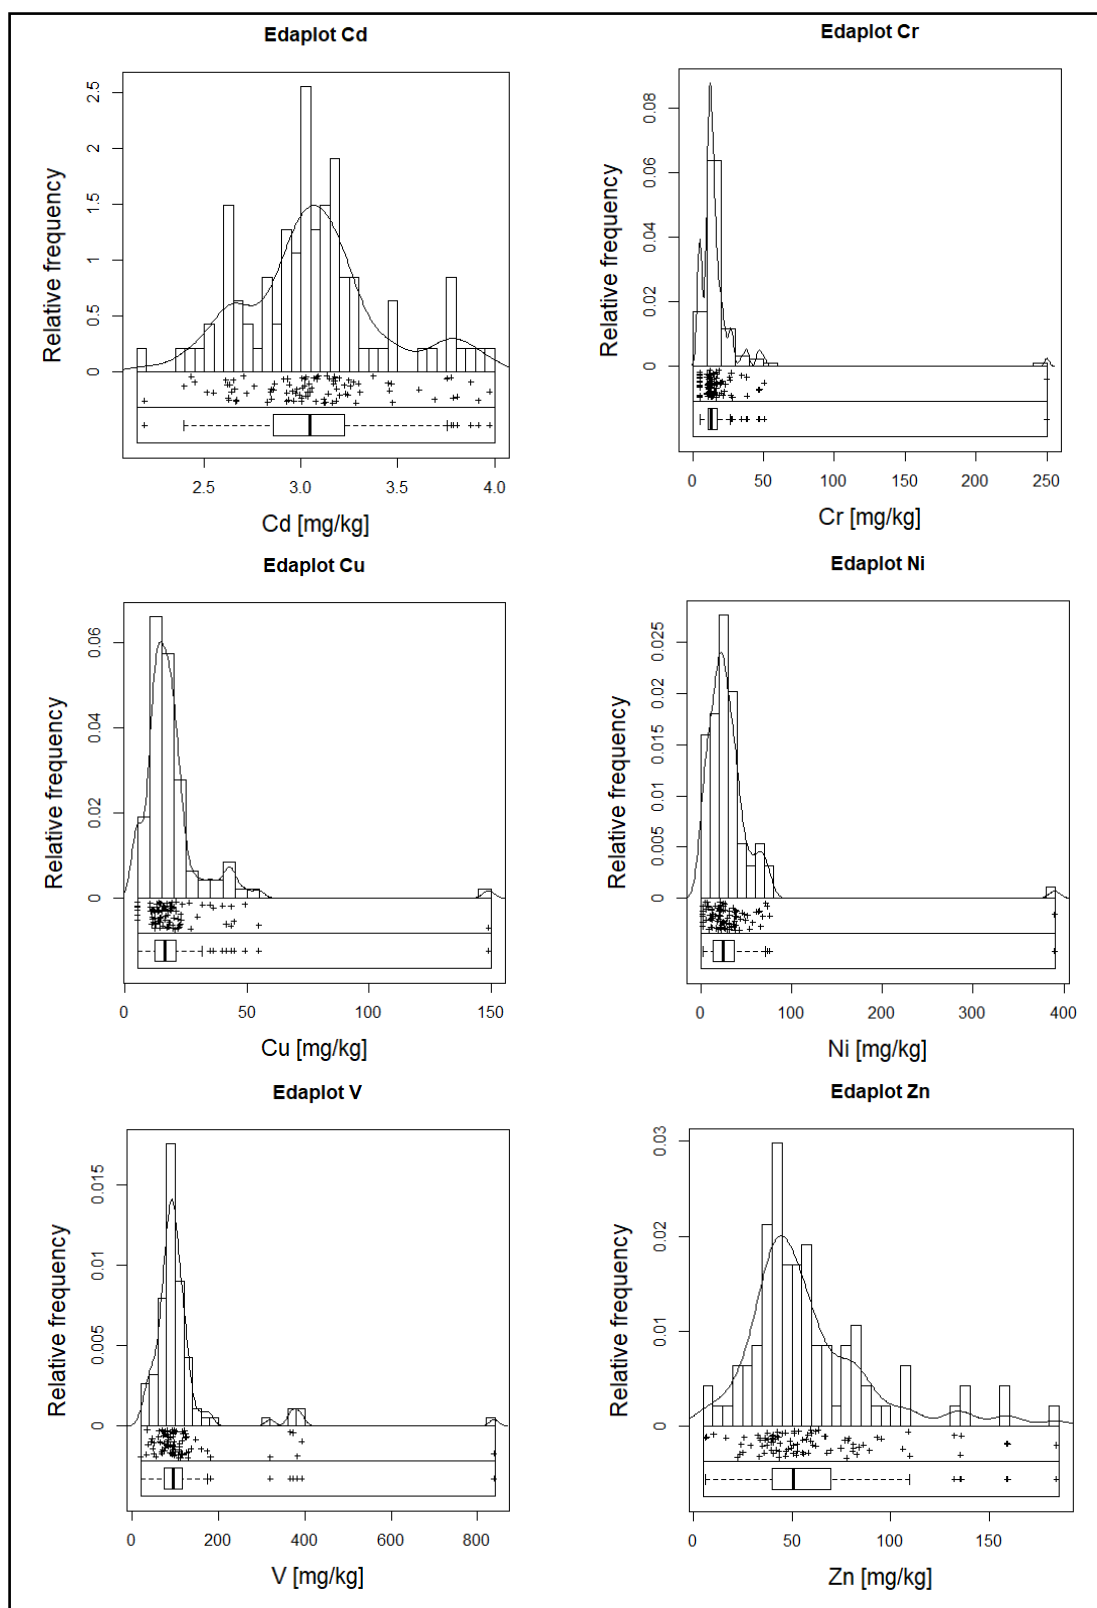

Figure S1: Edaplot of Cd, Cr, Cu, Ni, V and Zn concentrations, in mg/kg

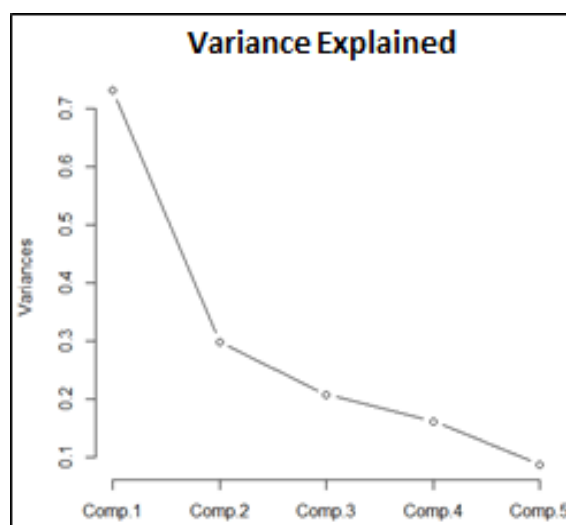

Figure S2: Cumulative variance explained by component

Table S1: Classification of soil contamination according to contamination indexes

| Index                        | Category          | Description                                   |
|------------------------------|-------------------|-----------------------------------------------|
| Geo-accumulatic index (IGEO) | $IGEO \leq 0$     | Not contaminated                              |
|                              | $0 < IGEO \leq 1$ | Slightly contaminated                         |
|                              | $1 < IGEO \leq 2$ | Moderately contaminated                       |
|                              | $2 < IGEO \leq 3$ | Moderately to highly contaminated             |
|                              | $3 < IGEO \leq 4$ | Highly contaminated                           |
|                              | $4 < IGEO \leq 5$ | Highly contaminated to extremely contaminated |
|                              | $IGEO > 5$        | Extremely contaminated                        |
| Enrichment Factor (EF)       | $EF \leq 2$       | Deficiency to minimal enrichment              |
|                              | $2 < EF \leq 5$   | Moderate enrichment                           |
|                              | $5 < EF \leq 20$  | Significant enrichment                        |
|                              | $20 < EF \leq 40$ | Very high enrichment                          |
|                              | $EF > 40$         | Extremely high enrichment                     |
| Contamination Factor (CF)    | $CF \leq 1$       | Low contamination                             |
|                              | $1 < CF \leq 3$   | Moderate contamination                        |
|                              | $3 < CF \leq 6$   | Considerable contamination                    |

|               |                |                                |
|---------------|----------------|--------------------------------|
|               | CF > 6         | Very high contamination factor |
| Contamination | CDEG ≤ 6       | Low contamination              |
| Degree (CDEG) | 6 < CDEG ≤ 12  | Moderate contamination         |
|               | 12 < CDEG ≤ 24 | Considerable contamination     |
|               | CDEG > 24      | Very high contamination factor |

Table S2: Values of the factors used in the equations referred to intake

| Exposure   | Parameters | Unit               | Values               |                      | Reference |
|------------|------------|--------------------|----------------------|----------------------|-----------|
|            |            |                    | Adult                | Child                |           |
| Ingestion  | IngR       | mg/day             | 100                  | 200                  | [21]      |
| Dermal     | SA         | cm <sup>2</sup>    | 5700                 | 2800                 | [21]      |
|            | SAF        | mg/cm <sup>2</sup> | 0.07                 | 0.2                  | [21]      |
|            | ABSd       | -                  | 0.001                | 0.001                | [48]      |
| Inhalation | InhR       | m <sup>3</sup> /d  | 14.5                 | 7.5                  | [31]      |
|            | PEF        | m <sup>3</sup> /kg | 1.36x10 <sup>9</sup> | 1.36x10 <sup>9</sup> | [21]      |
|            | EF         | day/year           | 350                  | 350                  | [21]      |
| Common     | ED         | Year               | 30                   | 6 <sup>1</sup>       | [21]      |
| Factors    | BW         | kg                 | 70                   | 15                   | [21]      |

<sup>1</sup>: Non-carcinogenic effect

Table S3: Factors used for the calculation of carcinogenic risk.

| Factor                  | Cd      | Cr (VI) | Cu    | Ni       | V      | Zn   |
|-------------------------|---------|---------|-------|----------|--------|------|
| RfDo (mg/Kg/d)          | 0.001a  | 0.003a  | 0.04b | 0.02a    | 0.007a | 0.3a |
| RfC (m <sup>3</sup> /d) | NE      | 0.0001a | NA    | NA       | NA     | NA   |
| ABS <sub>GI</sub>       | 0.025c  | 0.025c  | 0.57c | 0.04c    | 0.026c | 1e   |
| UR (ug/m3)              | 0.0018a | 0.012a  | NA    | 0.00024a | NA     | NA   |
| OSF (mg/kgd)            | NA      | 0.5d    | NA    | NA       | NA     | NA   |

NA: Not available a: [21] b: [47] c: [46] d: [49] e: [45]
